# Supplementary material for: S-1-propenylcysteine improves TNF-α-induced vascular endothelial barrier dysfunction by suppressing the GEF-H1/RhoA/Rac pathway
Source: Research Square preprint supplement (doi:10.21203/rs.3.rs-62924/v2), 2020-11-19

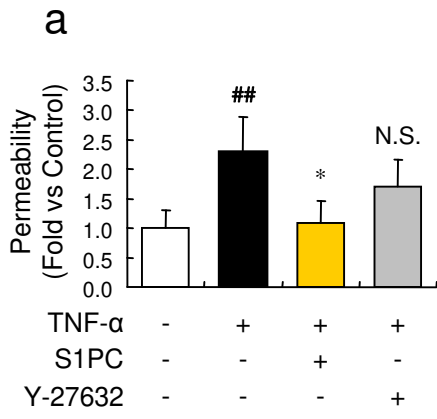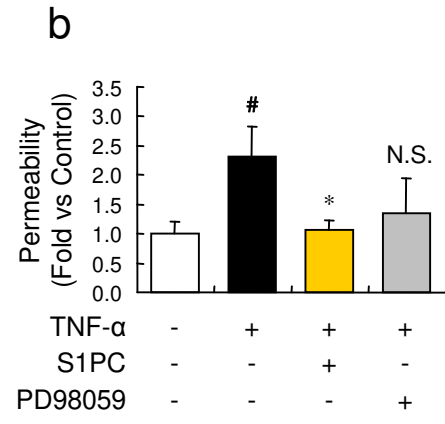

Supplement: Supplementary file [file 2959992db2f2ce0a884ec78d.pdf]
